# Supplementary material for: Global tropical cyclone size and intensity reconstruction dataset for 1959–2022 based on IBTrACS and ERA5 data
Source: Copernicus journal article supplement (doi:10.5194/essd-2024-329), 2024-08-06
Supplement: Supplementary file 1 [file essd-2024-329-supplement.pdf]

1 *Supplementary materials for*

2 **Global tropical cyclone size and intensity reconstruction dataset for**  
3 **1959–2022 based on IBTrACS and ERA5 data**

4 Zhiqi Xu<sup>1</sup>, Jianping Guo<sup>2\*</sup>, Guwei Zhang<sup>1</sup>, Yuchen Ye<sup>3</sup>, Haikun Zhao<sup>3</sup>, Haishan Chen<sup>3</sup>

5 <sup>1</sup>Institute of Urban Meteorology, China Meteorological Administration, Beijing 100089, China

6 <sup>2</sup>State Key Laboratory of Severe Weather, Chinese Academy of Meteorological Sciences, Beijing 100081, China

7 <sup>3</sup>Key Laboratory of Meteorological Disaster, Ministry of Education (KLME)/Joint International Research Laboratory of  
8 Climate and Environment Change (ILCEC)/Collaborative Innovation Center on Forecast and Evaluation of Meteorological  
9 Disasters (CIC-FEMD), Nanjing University of Information Science and Technology, Nanjing, 210044, China

10 **Correspondence:** J. Guo (Email: [jguocams@gmail.com](mailto:jguocams@gmail.com))

11

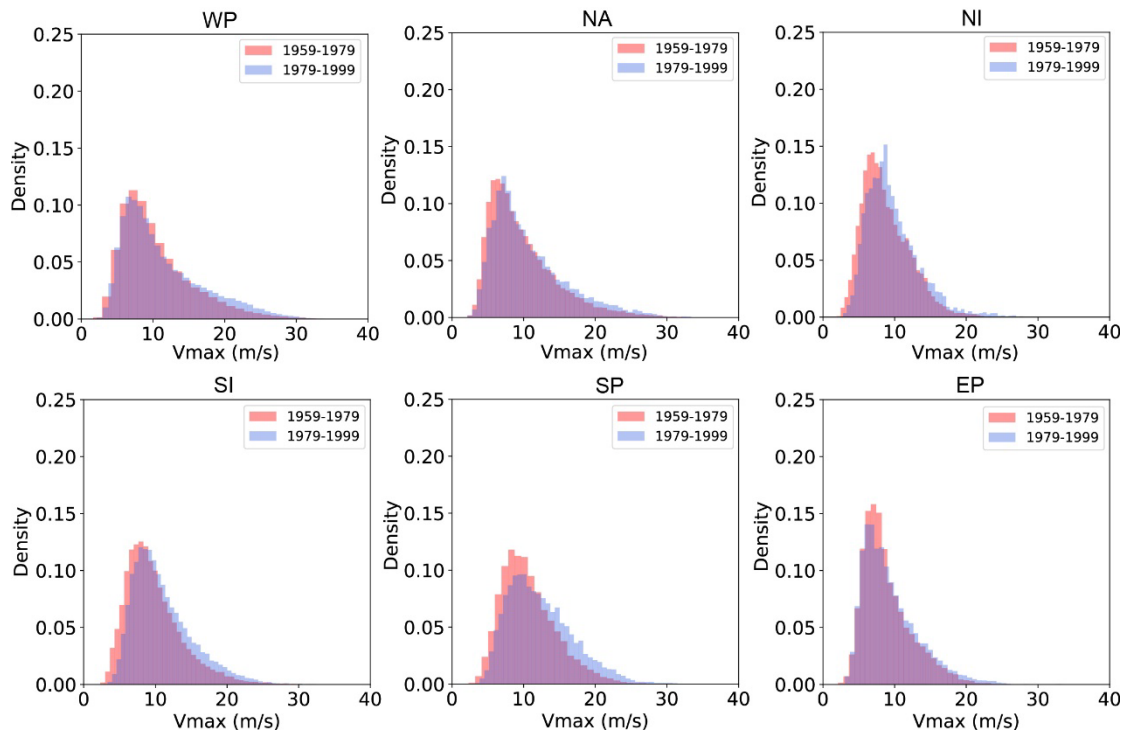

12

13 **Figure S1: Histogram comparison of ERA5  $V_{max}$  for tropical cyclones from 1959-1979 (red) and from 1979-1999 (blue).**

14

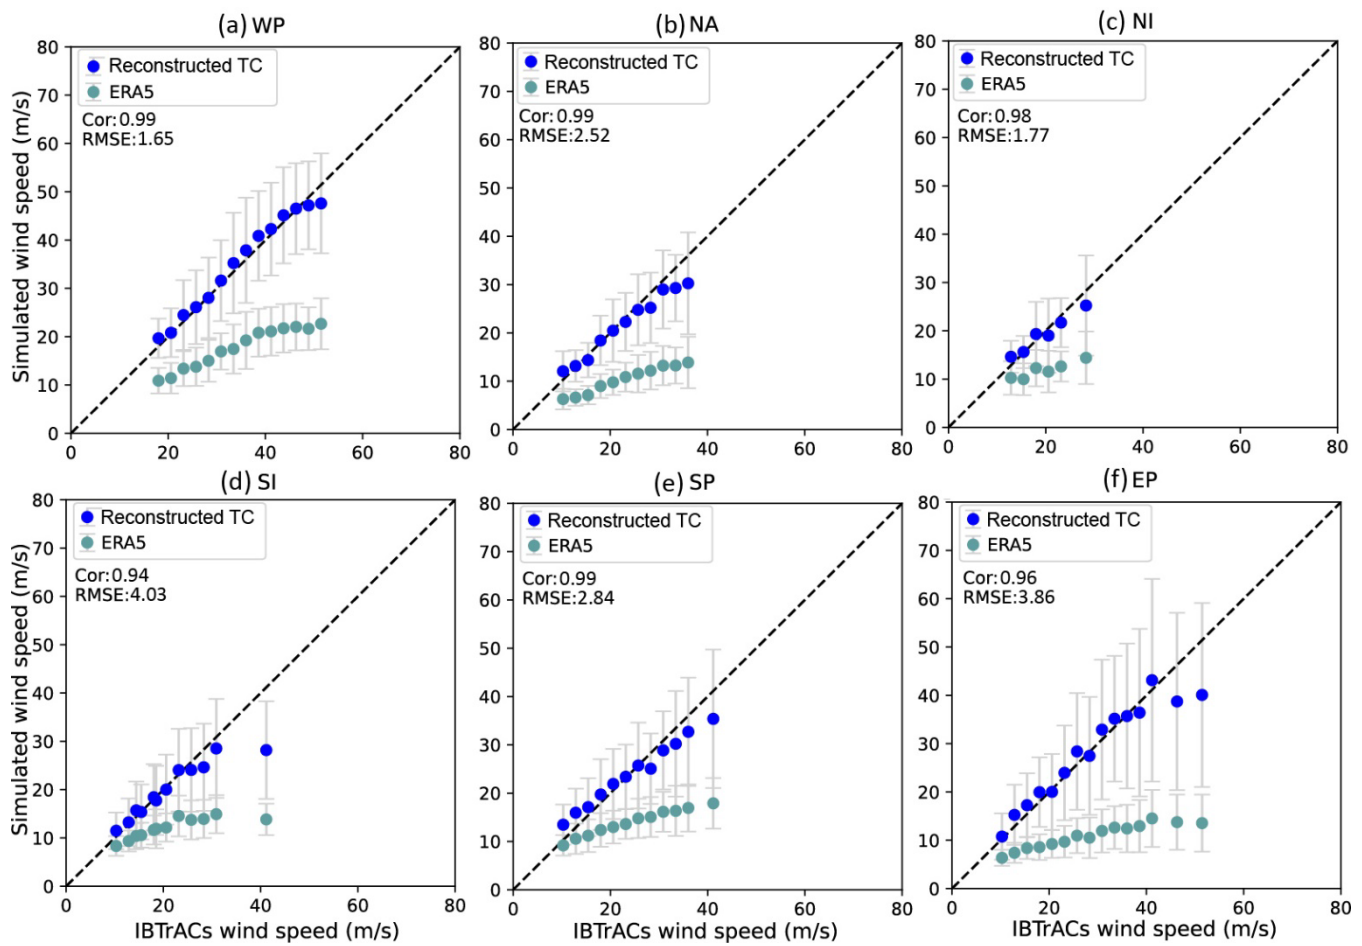

15  
16  
17  
18  
19  
20

Figure S2: Comparison between value-averaged maximum wind speeds ( $V_{max}$ ) from ERA5-derived and reconstructed (ERA5 + Random forest) data and IBTrACS maximum wind speeds for tropical cyclones during El Niño years in (a) Western Pacific, (b) North Atlantic, (c) North Indian, (d) South Indian, (e) South Pacific and (f) Eastern Pacific basins. Grey lines represent the error bar, given as one standard deviation from the mean.

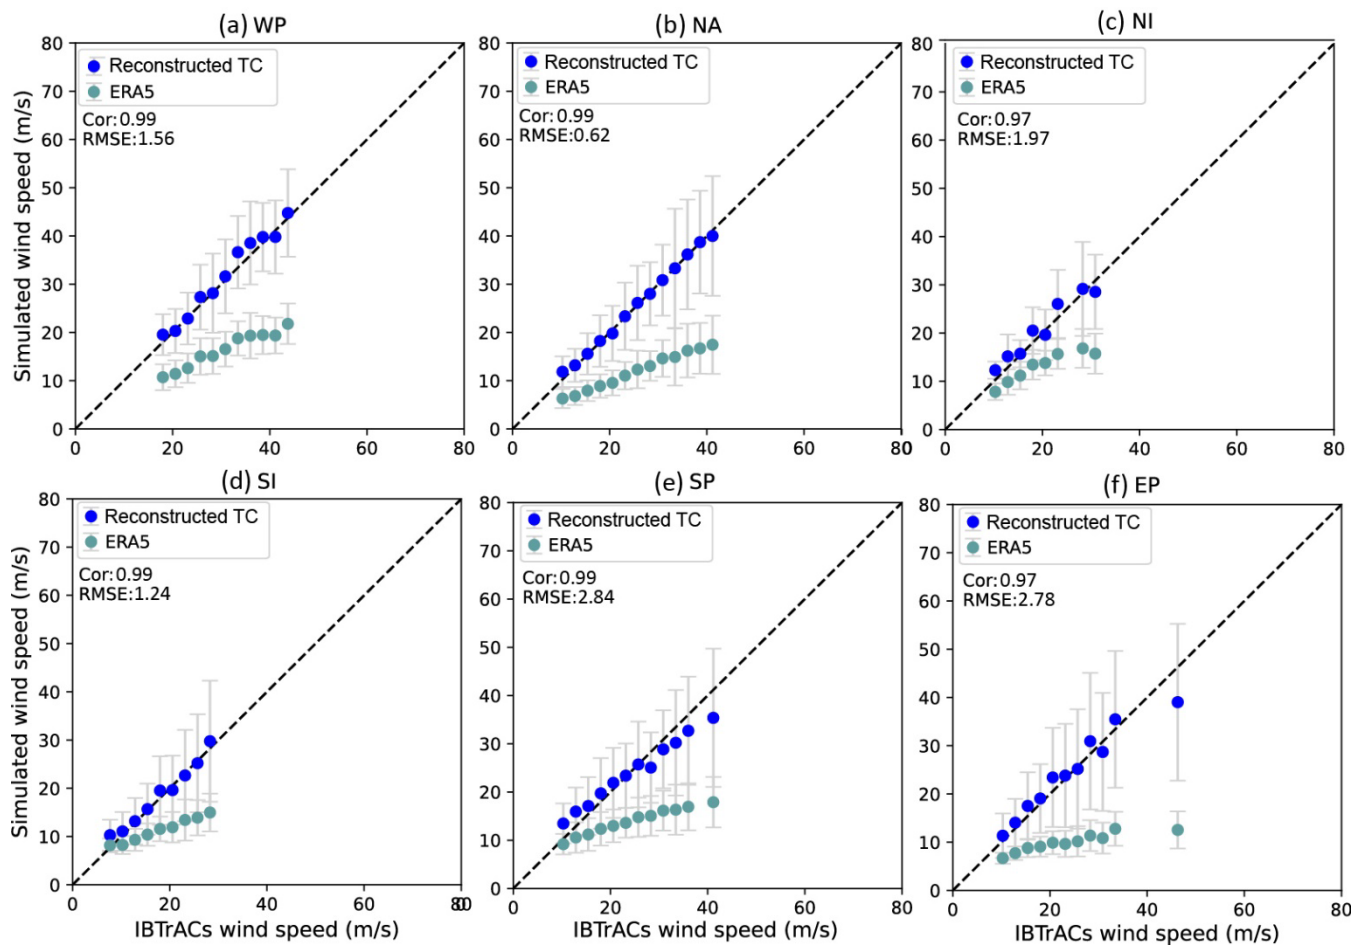

21

22 **Figure S3: Similar to Figure S2, but during La Niña years.**

23

24 **Table S1. Basic information on evaluation indices for  $R_{34}$ ,  $R_{50}$  and  $R_{64}$  in Western Pacific. ME, mean errors; MAE, mean of the**  
 25 **absolute bias; RMSE, root mean square error; CE, correlation coefficients. H80, D87, W06, E11, F13 and CLE15 refer to the wind**  
 26 **field models proposed by Holland (1980), DeMaria (1987), Willoughby et al. (2006), Emanuel and Rotunno (2011), Frisius and**  
 27 **Scgönemann (2013) and Chavas et al. (2015)**

|                      | ME (km) | MAE (km) | RMSE (km) | CE   |
|----------------------|---------|----------|-----------|------|
| H80 <sub>R34</sub>   | -80.39  | 89.34    | 110.54    | 0.68 |
| D87 <sub>R34</sub>   | -66.36  | 82.35    | 103.63    | 0.60 |
| W06 <sub>R34</sub>   | -24.79  | 46.75    | 64.54     | 0.89 |
| E11 <sub>R34</sub>   | -60.24  | 73.72    | 93.24     | 0.71 |
| F13 <sub>R34</sub>   | -106.04 | 110.49   | 132.57    | 0.68 |
| CLE15 <sub>R34</sub> | -60.60  | 74.80    | 93.53     | 0.72 |
| H80 <sub>R50</sub>   | -50.42  | 54.66    | 64.76     | 0.54 |
| D87 <sub>R50</sub>   | -39.40  | 47.11    | 56.91     | 0.52 |
| W06 <sub>R50</sub>   | -14.60  | 26.00    | 33.27     | 0.82 |
| E11 <sub>R50</sub>   | -28.29  | 46.90    | 56.26     | 0.25 |
| F13 <sub>R50</sub>   | -65.31  | 67.30    | 77.81     | 0.50 |
| CLE15 <sub>R50</sub> | -39.87  | 46.93    | 56.52     | 0.56 |
| H80 <sub>R64</sub>   | -32.13  | 33.66    | 39.06     | 0.60 |
| D87 <sub>R64</sub>   | -23.97  | 26.75    | 32.27     | 0.62 |
| W06 <sub>R64</sub>   | -14.14  | 18.28    | 22.71     | 0.78 |
| E11 <sub>R64</sub>   | -26.36  | 28.71    | 34.01     | 0.62 |
| F13 <sub>R64</sub>   | -41.06  | 41.86    | 47.22     | 0.56 |
| CLE15 <sub>R64</sub> | -24.32  | 27.25    | 32.73     | 0.61 |

28 **Table S2. Similar to Table S1, but in North Atlantic.**

|                      | ME (km) | MAE (km) | RMSE (km) | CE   |
|----------------------|---------|----------|-----------|------|
| H80 <sub>R34</sub>   | -50.20  | 63.41    | 89.89     | 0.87 |
| D87 <sub>R34</sub>   | -22.85  | 58.87    | 82.83     | 0.85 |
| W06 <sub>R34</sub>   | -41.75  | 67.06    | 112.55    | 0.81 |
| E11 <sub>R34</sub>   | -19.90  | 54.17    | 80.59     | 0.85 |
| F13 <sub>R34</sub>   | -91.60  | 94.33    | 122.41    | 0.87 |
| CLE15 <sub>R34</sub> | -25.19  | 53.00    | 78.77     | 0.87 |
| H80 <sub>R50</sub>   | -25.33  | 43.75    | 62.34     | 0.82 |
| D87 <sub>R50</sub>   | -6.81   | 45.40    | 66.86     | 0.79 |
| W06 <sub>R50</sub>   | -11.58  | 32.71    | 57.39     | 0.84 |
| E11 <sub>R50</sub>   | 25.41   | 61.73    | 89.89     | 0.82 |
| F13 <sub>R50</sub>   | -50.70  | 54.88    | 72.66     | 0.83 |
| CLE15 <sub>R50</sub> | -10.75  | 41.50    | 60.52     | 0.82 |
| H80 <sub>R64</sub>   | -15.35  | 27.55    | 39.46     | 0.82 |
| D87 <sub>R64</sub>   | -6.39   | 26.98    | 39.04     | 0.81 |
| W06 <sub>R64</sub>   | 2.67    | 18.52    | 30.37     | 0.87 |
| E11 <sub>R64</sub>   | -8.73   | 26.15    | 37.58     | 0.83 |
| F13 <sub>R64</sub>   | -27.81  | 31.47    | 42.17     | 0.85 |
| CLE15 <sub>R64</sub> | -5.52   | 26.38    | 37.92     | 0.83 |

29 **Table S3. Similar to Table S1, but in North Indian.**

|                      | ME (km) | MAE (km) | RMSE (km) | CE    |
|----------------------|---------|----------|-----------|-------|
| H80 <sub>R34</sub>   | -71.01  | 72.12    | 87.65     | 0.17  |
| D87 <sub>R34</sub>   | -62.28  | 64.64    | 81.20     | 0.18  |
| W06 <sub>R34</sub>   | -23.19  | 31.19    | 41.59     | 0.74  |
| E11 <sub>R34</sub>   | -59.22  | 61.89    | 77.41     | 0.27  |
| F13 <sub>R34</sub>   | -88.25  | 88.42    | 102.12    | 0.12  |
| CLE15 <sub>R34</sub> | -59.04  | 61.77    | 78.04     | 0.22  |
| H80 <sub>R50</sub>   | -40.23  | 41.11    | 49.98     | -0.17 |
| D87 <sub>R50</sub>   | -32.57  | 35.01    | 45.31     | -0.24 |
| W06 <sub>R50</sub>   | -14.66  | 20.49    | 25.69     | 0.63  |
| E11 <sub>R50</sub>   | -20.03  | 37.42    | 43.99     | -0.57 |
| F13 <sub>R50</sub>   | -49.46  | 50.07    | 57.74     | -0.29 |
| CLE15 <sub>R50</sub> | -32.77  | 34.95    | 44.63     | -0.18 |
| H80 <sub>R64</sub>   | -24.54  | 27.28    | 33.41     | -0.18 |
| D87 <sub>R64</sub>   | -19.30  | 24.63    | 30.47     | -0.23 |
| W06 <sub>R64</sub>   | -11.63  | 16.62    | 21.17     | 0.62  |
| E11 <sub>R64</sub>   | -22.20  | 25.82    | 31.92     | -0.19 |
| F13 <sub>R64</sub>   | -29.87  | 31.81    | 38.26     | -0.47 |
| CLE15 <sub>R64</sub> | -18.94  | 24.54    | 30.71     | -0.33 |

30 **Table S4. Similar to Table S1, but in South Indian.**

|                      | ME (km) | MAE (km) | RMSE (km) | CE    |
|----------------------|---------|----------|-----------|-------|
| H80 <sub>R34</sub>   | -52.37  | 66.93    | 86.54     | 0.40  |
| D87 <sub>R34</sub>   | -39.35  | 65.36    | 83.62     | 0.24  |
| W06 <sub>R34</sub>   | 3.57    | 45.71    | 56.68     | 0.74  |
| E11 <sub>R34</sub>   | -32.10  | 58.83    | 75.18     | 0.42  |
| F13 <sub>R34</sub>   | -77.33  | 82.86    | 103.96    | 0.40  |
| CLE15 <sub>R34</sub> | -34.01  | 58.82    | 75.05     | 0.46  |
| H80 <sub>R50</sub>   | -16.33  | 33.34    | 42.84     | 0.06  |
| D87 <sub>R50</sub>   | -4.94   | 33.45    | 41.81     | -0.01 |
| W06 <sub>R50</sub>   | 14.35   | 29.69    | 36.18     | 0.46  |
| E11 <sub>R50</sub>   | 10.50   | 40.17    | 49.96     | -0.13 |
| F13 <sub>R50</sub>   | -31.74  | 39.51    | 50.65     | -0.01 |
| CLE15 <sub>R50</sub> | -6.01   | 33.58    | 41.64     | 0.02  |
| H80 <sub>R64</sub>   | -6.23   | 18.45    | 23.88     | -0.01 |
| D87 <sub>R64</sub>   | 2.01    | 18.92    | 23.27     | 0.05  |
| W06 <sub>R64</sub>   | 9.68    | 18.54    | 21.57     | 0.43  |
| E11 <sub>R64</sub>   | -0.55   | 18.31    | 22.70     | 0.12  |
| F13 <sub>R64</sub>   | -17.11  | 21.82    | 28.37     | -0.06 |
| CLE15 <sub>R64</sub> | 0.36    | 18.21    | 22.42     | 0.13  |

32 **Table S5. Similar to Table S1, but in South Pacific.**

|                      | ME (km) | MAE (km) | RMSE (km) | CE   |
|----------------------|---------|----------|-----------|------|
| H80 <sub>R34</sub>   | -59.42  | 67.85    | 82.65     | 0.66 |
| D87 <sub>R34</sub>   | -46.49  | 61.37    | 77.34     | 0.57 |
| W06 <sub>R34</sub>   | -5.00   | 33.51    | 46.25     | 0.83 |
| E11 <sub>R34</sub>   | -39.66  | 53.81    | 67.68     | 0.69 |
| F13 <sub>R34</sub>   | -85.65  | 88.49    | 104.22    | 0.68 |
| CLE15 <sub>R34</sub> | -40.36  | 53.51    | 67.32     | 0.71 |
| H80 <sub>R50</sub>   | -21.77  | 30.51    | 36.71     | 0.64 |
| D87 <sub>R50</sub>   | -11.07  | 26.03    | 32.12     | 0.63 |
| W06 <sub>R50</sub>   | 11.75   | 21.53    | 27.25     | 0.77 |
| E11 <sub>R50</sub>   | 2.86    | 29.22    | 38.00     | 0.42 |
| F13 <sub>R50</sub>   | -38.11  | 41.99    | 49.05     | 0.62 |
| CLE15 <sub>R50</sub> | -10.19  | 24.78    | 31.18     | 0.65 |
| H80 <sub>R64</sub>   | -2.51   | 13.33    | 16.38     | 0.64 |
| D87 <sub>R64</sub>   | 5.80    | 14.17    | 17.05     | 0.66 |
| W06 <sub>R64</sub>   | 12.75   | 15.60    | 18.56     | 0.77 |
| E11 <sub>R64</sub>   | 4.97    | 14.14    | 17.02     | 0.68 |
| F13 <sub>R64</sub>   | -13.60  | 16.42    | 20.91     | 0.66 |
| CLE15 <sub>R64</sub> | 7.00    | 14.58    | 17.05     | 0.69 |

33 **Table S6. Similar to Table S1, but in Eastern Pacific.**

|                      | ME (km) | MAE (km) | RMSE (km) | CE   |
|----------------------|---------|----------|-----------|------|
| H80 <sub>R34</sub>   | -18.13  | 48.97    | 62.66     | 0.52 |
| D87 <sub>R34</sub>   | -7.32   | 55.07    | 69.07     | 0.41 |
| W06 <sub>R34</sub>   | 32.25   | 44.43    | 51.31     | 0.81 |
| E11 <sub>R34</sub>   | 4.02    | 50.50    | 64.00     | 0.53 |
| F13 <sub>R34</sub>   | -43.59  | 55.90    | 70.91     | 0.54 |
| CLE15 <sub>R34</sub> | 5.97    | 48.36    | 61.56     | 0.57 |
| H80 <sub>R50</sub>   | -9.60   | 27.55    | 36.73     | 0.32 |
| D87 <sub>R50</sub>   | -2.51   | 28.81    | 38.34     | 0.27 |
| W06 <sub>R50</sub>   | 27.19   | 31.77    | 36.61     | 0.68 |
| E11 <sub>R50</sub>   | 10.68   | 35.00    | 47.12     | 0.12 |
| F13 <sub>R50</sub>   | -23.54  | 31.68    | 40.92     | 0.31 |
| CLE15 <sub>R50</sub> | 1.73    | 27.70    | 37.00     | 0.34 |
| H80 <sub>R64</sub>   | -5.67   | 17.90    | 23.18     | 0.14 |
| D87 <sub>R64</sub>   | -0.32   | 18.69    | 23.92     | 0.11 |
| W06 <sub>R64</sub>   | 18.74   | 21.66    | 25.24     | 0.51 |
| E11 <sub>R64</sub>   | 0.59    | 17.86    | 22.98     | 0.19 |
| F13 <sub>R64</sub>   | -14.41  | 19.89    | 25.70     | 0.12 |
| CLE15 <sub>R64</sub> | 1.31    | 18.27    | 23.54     | 0.15 |
